# Supplementary material
Source: publisher figshare collection journal article supplement (https://tandf.figshare.com/ndownloader/files/22774679)
Supplement: Supplementary file 1 [file 22774679]

1 *SUPPLEMENTARY MATERIAL*

2 **Evaluation of lipid and cholesterol-lowering effect of bioflavonoids**  
3 **from bergamot extract**

4 Gabriele Ballistreri<sup>a\*</sup>, Margherita Amenta<sup>a</sup>, Simona Fabroni<sup>a</sup>, Valeria Consoli<sup>b</sup>, Salvo  
5 Grosso<sup>b</sup>, Luca Vanella<sup>b</sup>, Valeria Sorrenti<sup>b</sup> and Paolo Rapisarda<sup>a</sup>

6 <sup>a</sup>*Council for Agricultural Research and Economics (CREA) – Research Centre for*  
7 *Olive, Fruit and Citrus Crops, 95024 Acireale, Italy*

8 <sup>b</sup>*Department of Drug Science, Biochemistry Section, University of Catania, 95125*  
9 *Catania, Italy*

10 \*Corresponding Author: Gabriele Ballistreri, Council for Agricultural Research and  
11 Economics (CREA) – Research Centre for Olive, Fruit and Citrus Crops, 95024  
12 Acireale, Italy. E-mail: gabriele.ballistreri@crea.gov.it

13

14 **ABSTRACT**

15 Several natural products have been reported to be involved in the  
16 suppression of adipogenesis. In this study, we reveal that a bergamot  
17 extract (BE) decreased the accumulation of intracellular lipids in murine  
18 pre-adipocytes 3T3-L1 cells during adipogenic differentiation. Both the  
19 inhibition of HMG-CoA reductase activity and the differentiation and  
20 proliferation of adipocytes could be used as a strategy for the treatment  
21 and prevention of obesity. The results of this study show a reduction of  
22 HMG-CoA activity and of lipid droplet accumulation in the presence of  
23 the BE, suggesting the potential of BE as an antiadipogenic agent to lower  
24 the content of cholesterol and body fat and prevent a gain in body weight.  
25 Moreover, BE as the result of high percentages of flavonoid compounds  
26 such as neoriocitrin, naringin and neohesperidin, the main flavonoids  
27 contained in BE, led to a significant inhibition of DPPH free radical,  
28 demonstrating a strong radical scavenging activity.

29 **RESULTS AND DISCUSSION (FIGURES)**

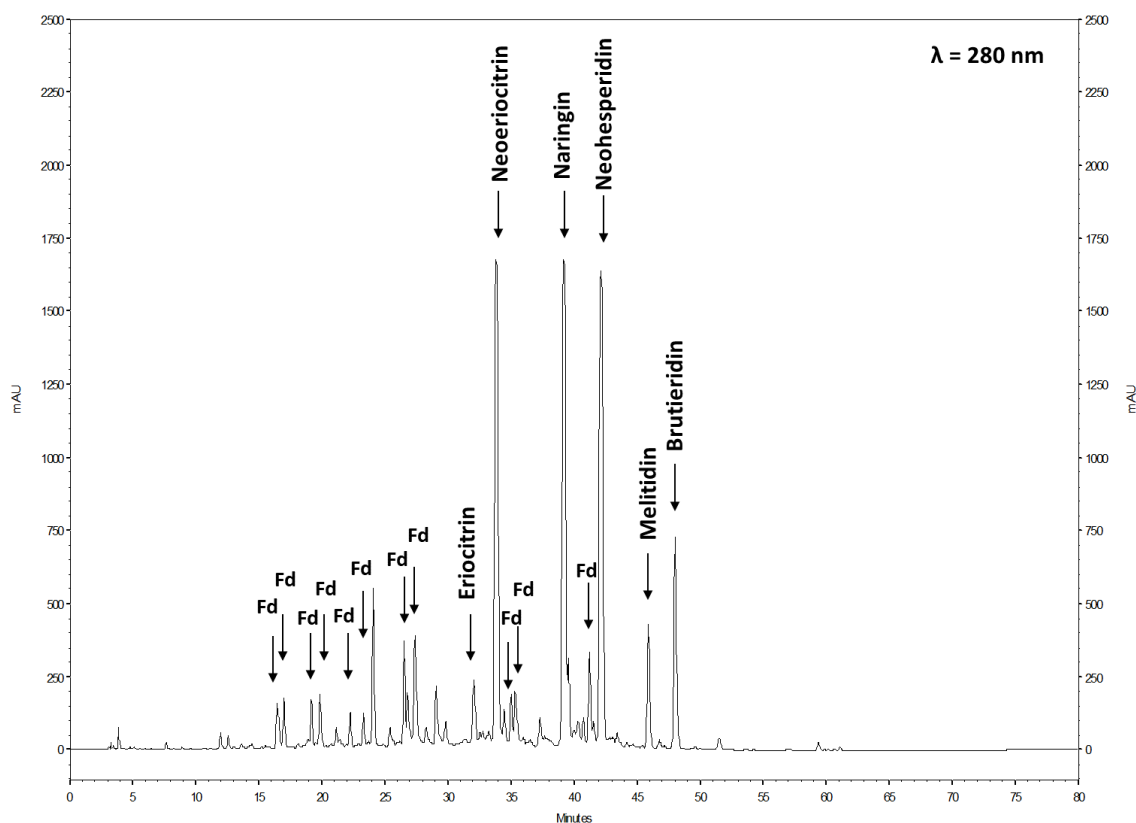

30

| Phenolic compounds | $\lambda_{\max}$ (nm) | $[M-H]^-$ ( $m/z$ ) | g/100 g <sup>a</sup> |
|--------------------|-----------------------|---------------------|----------------------|
| Fd <sup>b</sup>    | 239, 282              | -                   | 5.40 ± 0.43          |
| Eriocitrin         | 239, 282              | 595                 | 0.80 ± 0.08          |
| Neeriocitrin       | 242, 283              | 595                 | 13.15 ± 1.00         |
| Naringin           | 243, 282              | 579                 | 15.74 ± 0.23         |
| Neohesperidin      | 242, 283              | 609                 | 13.88 ± 0.68         |
| Melitidin          | 242, 283              | 723                 | 2.02 ± 0.11          |
| Brutieridin        | 242, 283              | 753                 | 3.97 ± 0.22          |
| <i>Total</i>       |                       |                     | 54.96 ± 1.45         |

<sup>a</sup> Results are expressed as the mean ± SD.

<sup>b</sup> Flavanone derivative (Fd).

31

32 **Figure S1.** HPLC chromatogram and quantification of the flavanones of bergamot  
 33 extract detected at 280 nm.

34

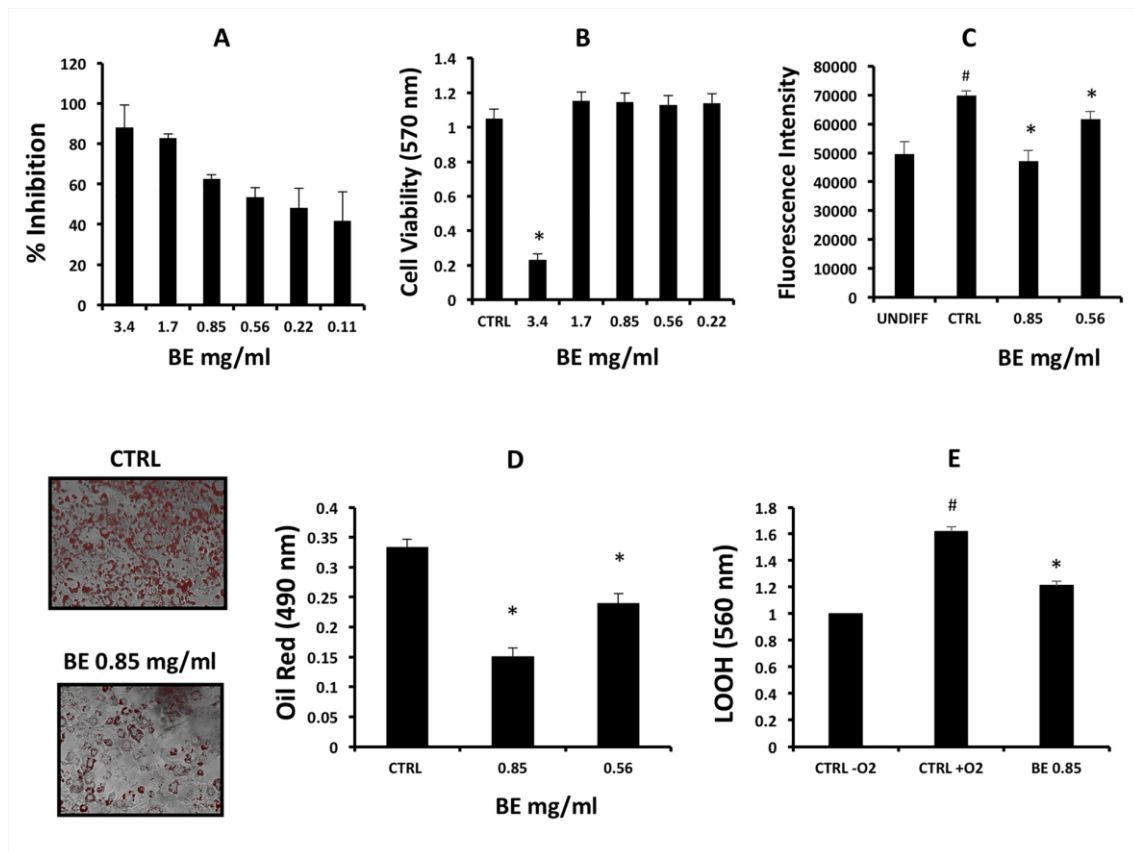

35

36

37 **Figure S2.** (A) DPPH radical scavenging activities of BE at different concentrations.

38 Results are expressed as percentage of inhibition rate  $\pm$  SD. (B) Cell viability of 3T3-L1

39 in absence or presence of BE at different concentrations (3.4 - 1.7 - 0.85 - 0.56 - 0.22

40 mg/ml). Results are expressed as the means  $\pm$  SD of 4 experiments performed in

41 triplicate. Significant vs untreated controls: \* $p < 0.005$ . (C) Intracellular ROS in

42 undifferentiated (UNDIFF) and differentiated cells (CTRL) untreated and treated with

43 BE (0.85 and 0.56 mg/ml). Values are the means  $\pm$  SD of 4 experiments in triplicate.

44 Significant vs. untreated control cells, \* $p < 0.05$ ; Significant vs. undifferentiated cells,

45 # $p < 0.05$ . (D) Representative Oil red O staining of 3T3-L1 cells in absence and in

46 presence of BE. Lipid content was quantified at 490 nm (mean  $\pm$  SD, \* $p < 0.05$  versus

47 control). (E) Effect of BE on lipid hydroperoxide levels in human plasma incubated at

48 37 °C for 2 h. Significant vs. oxygenated control, \* $p < 0.05$ ; Significant vs.

49 unoxygenated control, # $p < 0.05$ .



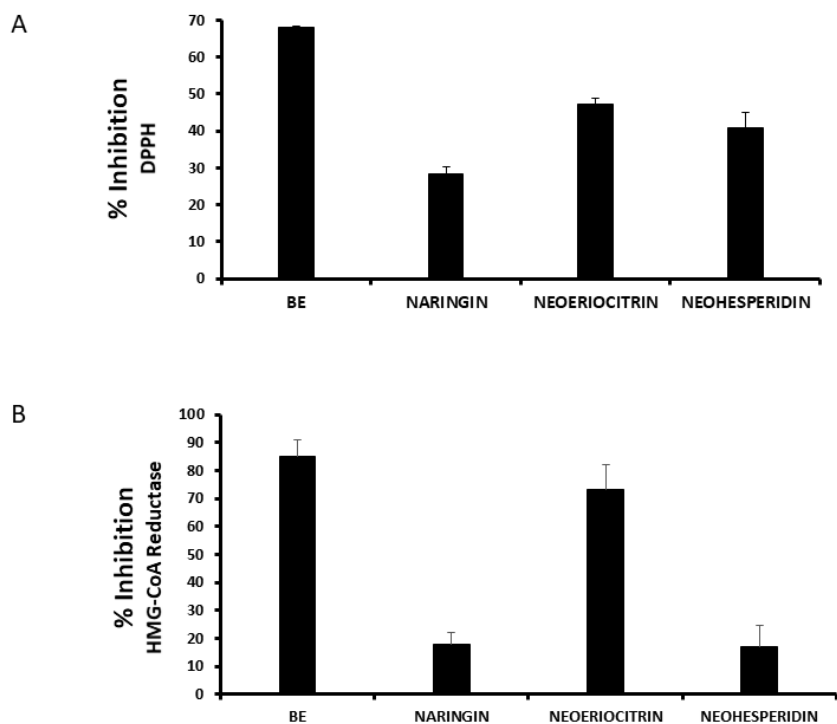

51

52 **Figure S3.** (A) DPPH radical scavenging activities of BE (0.85 mg/ml) and of different  
 53 concentrations of neohesperidin, naringin and neohesperidin (0.111 mg/ml, 0.133 mg/ml  
 54 and 0.117 mg/ml). Results are expressed as percentage of inhibition rate  $\pm$  SD. (B)  
 55 HMG-CoA inhibiting activities of BE (0.85 mg/ml) and of different concentrations of  
 56 neohesperidin, naringin and neohesperidin (0.111 mg/ml, 0.133 mg/ml and 0.117 mg/ml).  
 57 Results are expressed as percentage of inhibition rate  $\pm$  SD.

## 58 **EXPERIMENTAL**

### 59 *Extraction*

60 BERGASTAT® dry powdered extract (batch no. 19/064), manufactured by Medinutrex  
61 (Catania, Italy), standardised to contain  $\geq 50.0\%$  total flavanones (HPLC method), was  
62 used as BE for the assays. Separation and quantification of phenolic compounds were  
63 performed as previously described (Amenta et al. 2015). The extract was obtained from  
64 fruit (*fructus*) from Calabrian bergamots (*Citrus bergamia* Risso & Poiteau) (cultivars:  
65 ‘Femminello’, ‘Castagnaro’ and ‘Fantastico’), harvested from November to February.  
66 The extract was prepared from the solutions resulting by the pressing of the fruits,  
67 previously subjected to treatment with depectinizing enzymes, then decanted and  
68 filtered. The resulting solutions has been absorbed onto an adsorbent polymeric resin  
69 with a styrene-divinylbenzene brominated matrix, then the resin was washed with water  
70 and eluted with hydroalcoholic solutions. After distillation and recovery of alcohol  
71 (ethanol), the concentrated aqueous extract was subjected to spray drying process to  
72 obtain the dry powdered extract.

### 73 *Inhibition of DPPH*

74 The free radical scavenging activity of BE was evaluated using the DPPH (2,2-  
75 diphenyl-1-picrylhydrazyl) test. The reaction mixture contained 86  $\mu\text{M}$  DPPH, different  
76 concentrations of extract (3.4, 1.7, 0.85, 0.56, 0.22 and 0.11 mg/ml) and of neoriocitrin,  
77 naringin and neohesperidin, (0.111 mg/ml, 0.133 mg/ml and 0.117 mg/ml) in 1 ml of  
78 ethanol. After 10 min at room temperature the absorbance at  $\lambda = 517$  nm was recorded.

### 79 *Cell culture and cell viability*

80 The murine pre-adipocytes cell line 3T3-L1 was cultured in Dulbecco’s modified  
81 Eagle’s medium (DMEM) 4.5 g/L glucose, supplemented with 10% FBS, 1% penicillin,  
82 and streptomycin at 37 °C and 5% CO<sub>2</sub>. 3T3-L1 cells were seeded at a concentration of  
83  $2 \times 10^5$  cells per well of a 96-well, flat-bottomed 200  $\mu\text{l}$  microplate. The cultures were  
84 maintained in the presence of different concentrations (3.4, 1.7, 0.85, 0.56 and 0.22  
85 mg/ml) of Bergamot extract for 24 h. Cell viability was measured by MTT assay as  
86 previously reported (Raffaele et al. 2018; Raffaele et al. 2019a).

### 87 *Measurement of ROS levels*

88 Determination of reactive oxygen species (ROS) was performed using a fluorescent  
89 probe 2',7'-dichlorofluorescein diacetate (DCFH-DA), as previously described (Raffaele  
90 et al. 2019b). The fluorescence was measured spectrofluorometrically (excitation,  
91  $\lambda=488$  nm; emission,  $\lambda=525$  nm).

92 *Differentiation of 3T3-L1 cells*

93 3T3-L1 cells were sub-cultured in three groups: undifferentiated, grown with standard  
94 DMEM; differentiated, grown with adipogenic medium obtained as previously  
95 described (Sorrenti et al. 2019), and differentiated with BE, grown with co-treatment of  
96 adipogenic medium and two different BE concentrations (0.85 and 0.56 mg/ml).

97 *Oil Red O Staining*

98 Staining solution was achieved using 0.21% oil red O in 100% isopropanol (Sigma-  
99 Aldrich, St. Louis, MO, USA). Briefly, adipocytes, grown in 24-well plate, were fixed  
100 in 10% formaldehyde, stained with oil red O for 10 min, as previously described  
101 (Raffaele et al. 2019b).

102 *Determination of Lipid Hydroperoxide Levels in the Plasma of a Healthy Donor*

103 Plasmatic lipid hydroperoxide levels were evaluated by oxidation of  $Fe^{2+}$  to  $Fe^{3+}$  in the  
104 presence of xylenol orange at  $\lambda = 560$  nm as previously reported (Salerno et al. 2012)  
105 Plasma aliquots (500  $\mu$ L) were diluted 1:1 with oxygenated and unoxygenated PBS and  
106 incubated at 37 °C for 2 h with or without BE (0.85 mg/mL) in a total volume of 1 ml.  
107 Results are expressed as fold of change respect to control -  $O_2$  (plasma incubated with  
108 unoxygenated PBS) and represent the mean  $\pm$  SD of four experimental determinations.

109 *HMG-CoA activity*

110 The HMG-CoA Reductase Activity Assay Kit from Abcam (Cambridge, United  
111 Kingdom) was used for measuring activity of purified HMG-CoA reductase in absence  
112 or in presence of BE (0.85 mg/mL) and neoriocitrin, naringin and neohesperidin (0.111  
113 mg/ml, 0.133 mg/ml and 0.117 mg/ml) according to manufacturer's instructions. It is a  
114 colorimetric method based on the consumption of NADPH by the enzyme, which can  
115 be measured by the decrease of absorbance at OD = 340 nm. Results are expressed as  
116 percentage of inhibition of HMG-CoA reductase activity and represent the mean  $\pm$  SD  
117 of four experimental determinations.

118 *Statistical analysis*

119 Statistical analyses of multiple comparisons were performed by the Fisher method. P-  
120 values lower than 0.05 were accepted as significant. Data were analyzed using either  
121 single-factor analysis of variance (ANOVA) for multiple groups, or the unpaired t-test  
122 for two groups, and the results are presented as mean  $\pm$  standard deviation (SD).

123 **REFERENCES**

- 124 Amenta M, Ballistreri G, Fabroni S, Romeo FV, Spina A, Rapisarda P. 2015.  
125 Qualitative and nutraceutical aspects of lemon fruits grown on the mountainsides  
126 of the Mount Etna: a first step for a protected designation of origin or protected  
127 geographical indication application of the brand name “Limone dell’Etna”. Food  
128 Res Int. 74:250-259.
- 129 Raffaele M, Barbagallo I, Licari M, Carota G, Sferrazzo G, Spampinato M, Sorrenti V,  
130 Vanella L. 2018. N-Acetylcysteine (NAC) ameliorates lipid-related metabolic  
131 dysfunction in bone marrow stromal cells-derived adipocytes. Evid Based  
132 Complement Alternat Med. 5310961:1-9.
- 133 Raffaele M, Pittalà V, Zingales V, Barbagallo I, Salerno L, Li Volti G, Romeo G,  
134 Carota G, Sorrenti V, Vanella L. 2019a. Heme oxygenase-1 inhibition sensitizes  
135 human prostate cancer cells towards glucose deprivation and metformin-  
136 mediated cell death. Int J Mol Sci. 20(10)2593:1-16.
- 137 Raffaele M, Carota G, Sferrazzo G, Licari M, Barbagallo I, Sorrenti V, Signorelli SS,  
138 Vanella L. 2019b. Inhibition of heme oxygenase antioxidant activity exacerbates  
139 hepatic steatosis and fibrosis *in vitro*. Antioxidants. 8(277):1-12.
- 140 Salerno L, Modica MN, Romeo G, Pittalà V, Siracusa MA, Amato ME, Acquaviva R,  
141 Di Giacomo C, Sorrenti V. 2012. Novel inhibitors of nitric oxide synthase with  
142 antioxidant properties. Eur J Med Chem.49:118-126.
- 143 Sorrenti V, Randazzo CL, Caggia C, Ballistreri G, Romeo FV, Fabroni S, Timpanaro N,  
144 Raffaele M, Vanella L. 2019. Beneficial effects of pomegranate peel extract and  
145 probiotics on pre-adipocyte differentiation. Front Microbiol. 10(660):1-11.
